# Supplementary material for: Longitudinal Association Between Physical Activity and Frailty Among Community‐Dwelling Older Adults
Source: PubMed Central journal article supplement — J Am Geriatr Soc. 2020 Mar 20;68(7):1484–93. doi: 10.1111/jgs.16391 (PMC7383618; doi:10.1111/jgs.16391), 2020-03-20

**Supplementary Table S1 *P*-values for interactions between baseline frequency of moderate PA or 12-month change in frequency of moderate PA and age, sex, county, educational level, living situation and intervention on the frailty scores**

| Items                                                                                               | Overall frailty | Physical frailty | Psychological frailty | Social frailty  |
|-----------------------------------------------------------------------------------------------------|-----------------|------------------|-----------------------|-----------------|
|                                                                                                     | <i>P</i> -value | <i>P</i> -value  | <i>P</i> -value       | <i>P</i> -value |
| <b>Interactions in models on associations between baseline frequency of moderate PA and frailty</b> |                 |                  |                       |                 |
| Baseline frequency of moderate PA*Age                                                               | 0.452           | 0.193            | 0.838                 | 0.350           |
| Baseline frequency of moderate PA*Sex                                                               | 0.692           | 0.754            | 0.878                 | 0.877           |
| Baseline frequency of moderate PA*Country                                                           | 0.409           | 0.142            | 0.346                 | 0.705           |
| Baseline frequency of moderate PA*Educational level                                                 | 0.923           | 0.885            | 0.658                 | 0.056           |
| Baseline frequency of moderate PA* Live situation                                                   | 0.926           | 0.966            | 0.497                 | 0.924           |
| Baseline frequency of moderate PA*Intervention                                                      | 0.142           | 0.269            | 0.303                 | 0.479           |
| <b>Interactions in models on associations between 12-month change in moderate PA and frailty</b>    |                 |                  |                       |                 |
| Change in moderate PA*Age                                                                           | 0.443           | 0.216            | 0.838                 | 0.546           |
| Change in moderate PA*Sex                                                                           | 0.766           | 0.928            | 0.682                 | 0.943           |
| Change in moderate PA*Country                                                                       | 0.136           | 0.189            | <b>&lt;0.001</b>      | 0.856           |
| Change in moderate PA*Educational level                                                             | 0.719           | 0.542            | 0.117                 | 0.148           |
| Change in moderate PA*Live situation                                                                | 0.682           | 0.272            | 0.089                 | 0.022           |
| Change in moderate PA*Intervention                                                                  | 0.399           | 0.743            | 0.714                 | 0.329           |

Significant *P*-values in bold

After applying Bonferroni correction for multiple testing ( $P=0.05/48=0.001$ ), except interaction between country and change in physical activity on follow-up psychological frailty score, no statistically significant interaction was found.

Abbreviations: PA = physical activity

Supplementary Table S2 Multivariate linear regression models (frequency of moderate physical activity at baseline and follow-up scores of frailty)

| Items                                                   | 12-month follow-up overall frailty    |                                       | 12-month follow-up physical frailty   |                                       | 12-month follow-up psychological frailty |                                       | 12-month follow-up social frailty  |                                    |
|---------------------------------------------------------|---------------------------------------|---------------------------------------|---------------------------------------|---------------------------------------|------------------------------------------|---------------------------------------|------------------------------------|------------------------------------|
|                                                         | Crude Model                           | Adjusted Model                        | Crude Model                           | Adjusted Model                        | Crude Model                              | Adjusted Model                        | Crude Model                        | Adjusted Model                     |
|                                                         | B(95%CI)                              | B(95%CI)                              | B(95%CI)                              | B(95%CI)                              | B(95%CI)                                 | B(95%CI)                              | B(95%CI)                           | B(95%CI)                           |
| <b>Baseline frequency of moderate physical activity</b> |                                       |                                       |                                       |                                       |                                          |                                       |                                    |                                    |
| Regular frequency                                       | <i>Reference</i>                      | <i>Reference</i>                      | <i>Reference</i>                      | <i>Reference</i>                      | <i>Reference</i>                         | <i>Reference</i>                      | <i>Reference</i>                   | <i>Reference</i>                   |
| Low frequency                                           | <b>0.39<sup>b</sup>(0.13,0.66)</b>    | <b>0.28<sup>a</sup>(0.01,0.55)</b>    | <b>0.27<sup>b</sup>(0.08,0.45)</b>    | 0.18(-0.01,0.37)                      | <b>0.21<sup>c</sup>(0.10,0.31)</b>       | <b>0.16<sup>b</sup>(0.05,0.27)</b>    | 0.05(-0.02,0.13)                   | 0.06(-0.02,0.13)                   |
| <b>Baseline overall frailty</b>                         | <b>0.69<sup>c</sup>(0.65,0.73)</b>    | <b>0.65<sup>c</sup>(0.61,0.69)</b>    |                                       |                                       |                                          |                                       |                                    |                                    |
| <b>Baseline physical frailty</b>                        |                                       |                                       | <b>0.66<sup>c</sup>(0.62,0.70)</b>    | <b>0.62<sup>c</sup>(0.58,0.67)</b>    |                                          |                                       |                                    |                                    |
| <b>Baseline psychological frailty</b>                   |                                       |                                       |                                       |                                       | <b>0.56<sup>c</sup>(0.51,0.60)</b>       | <b>0.54<sup>c</sup>(0.50,0.59)</b>    |                                    |                                    |
| <b>Baseline social frailty</b>                          |                                       |                                       |                                       |                                       |                                          |                                       | <b>0.62<sup>c</sup>(0.59,0.66)</b> | <b>0.39<sup>c</sup>(0.34,0.44)</b> |
| <b>Age</b>                                              |                                       | <b>0.04<sup>c</sup>(0.02,0.07)</b>    |                                       | <b>0.03<sup>b</sup>(0.01,0.04)</b>    |                                          | <b>0.01<sup>a</sup>(0.00,0.02)</b>    |                                    | 0.01(-0.00,0.01)                   |
| <b>Sex</b>                                              |                                       |                                       |                                       |                                       |                                          |                                       |                                    |                                    |
| <i>Male</i>                                             |                                       | <i>Reference</i>                      |                                       | <i>Reference</i>                      |                                          | <i>Reference</i>                      |                                    | <i>Reference</i>                   |
| <i>Female</i>                                           |                                       | 0.24(-0.01,0.48)                      |                                       | 0.11(-0.06,0.29)                      |                                          | <b>0.12<sup>a</sup>(0.02,0.22)</b>    |                                    | 0.04(-0.03,0.11)                   |
| <b>Country</b>                                          |                                       |                                       |                                       |                                       |                                          |                                       |                                    |                                    |
| <i>Spain</i>                                            | <i>Reference</i>                      | <i>Reference</i>                      | <i>Reference</i>                      | <i>Reference</i>                      | <i>Reference</i>                         | <i>Reference</i>                      | <i>Reference</i>                   | <i>Reference</i>                   |
| <i>Greece</i>                                           | -0.05(-0.46,0.36)                     | -0.20(-0.21,0.62)                     | -0.21(-0.50,0.07)                     | -0.08(-0.37,0.21)                     | <b>0.18<sup>a</sup>(0.02,0.35)</b>       | <b>0.25<sup>b</sup>(0.08,0.42)</b>    | 0.08(-0.04,0.20)                   | <b>0.21<sup>b</sup>(0.09,0.33)</b> |
| <i>Croatia</i>                                          | <b>0.83<sup>c</sup>(0.50,1.17)</b>    | <b>0.96<sup>c</sup>(0.57,1.36)</b>    | <b>0.44<sup>c</sup>(0.20,0.67)</b>    | <b>0.54<sup>c</sup>(0.26,0.81)</b>    | <b>0.32<sup>c</sup>(0.19,0.45)</b>       | <b>0.35<sup>c</sup>(0.19,0.51)</b>    | <b>0.17<sup>b</sup>(0.07,0.27)</b> | <b>0.22<sup>b</sup>(0.10,0.33)</b> |
| <i>The Netherlands</i>                                  | -0.19(-0.55,0.18)                     | -0.08(-0.49,0.32)                     | -0.11(-0.37,0.14)                     | 0.01(-0.28,0.29)                      | <b>-0.16<sup>a</sup>(-0.30,-0.01)</b>    | -0.11(-0.27,0.05)                     | 0.05(-0.06,0.16)                   | -0.01(-0.11,0.12)                  |
| <i>The United Kingdom</i>                               | <b>-0.45<sup>b</sup>(-0.76,-0.14)</b> | <b>-0.45<sup>a</sup>(-0.84,-0.07)</b> | <b>-0.45<sup>c</sup>(-0.67,-0.23)</b> | <b>-0.43<sup>b</sup>(-0.70,-0.16)</b> | <b>-0.15<sup>a</sup>(-0.28,-0.03)</b>    | -0.10(-0.26,0.05)                     | <b>0.12<sup>a</sup>(0.02,0.21)</b> | 0.04(-0.07,0.15)                   |
| <b>Educational level</b>                                |                                       |                                       |                                       |                                       |                                          |                                       |                                    |                                    |
| <i>Tertiary or higher</i>                               |                                       | <i>Reference</i>                      |                                       | <i>Reference</i>                      |                                          | <i>Reference</i>                      |                                    | <i>Reference</i>                   |
| <i>Secondary or equivalent</i>                          |                                       | 0.12(-0.26,0.51)                      |                                       | 0.13(-0.14,0.40)                      |                                          | 0.04(-0.12,0.19)                      |                                    | -0.00(-0.11,0.11)                  |
| <i>Primary or less versus</i>                           |                                       | <b>0.55<sup>a</sup>(0.11,0.98)</b>    |                                       | <b>0.40<sup>a</sup>(0.10,0.71)</b>    |                                          | 0.17(-0.01,0.34)                      |                                    | 0.07(-0.06,0.19)                   |
| <b>Living situation</b>                                 |                                       |                                       |                                       |                                       |                                          |                                       |                                    |                                    |
| <i>Living with others</i>                               |                                       | <i>Reference</i>                      |                                       | <i>Reference</i>                      |                                          | <i>Reference</i>                      |                                    | <i>Reference</i>                   |
| <i>Living alone</i>                                     |                                       | 0.06(-0.19,0.31)                      |                                       | -0.12(-0.29,0.06)                     |                                          | <b>-0.13<sup>b</sup>(-0.23,-0.03)</b> |                                    | <b>0.61<sup>c</sup>(0.52,0.70)</b> |
| <b>Smoking</b>                                          |                                       |                                       |                                       |                                       |                                          |                                       |                                    |                                    |
| <i>No</i>                                               |                                       | <i>Reference</i>                      |                                       | <i>Reference</i>                      |                                          | <i>Reference</i>                      |                                    | <i>Reference</i>                   |

|                               |                                       |      |                                       |      |                                       |      |                   |      |
|-------------------------------|---------------------------------------|------|---------------------------------------|------|---------------------------------------|------|-------------------|------|
| Yes                           | 0.02(-0.39,0.43)                      |      | -0.15(-0.44,0.14)                     |      | 0.11(-0.06,0.27)                      |      | 0.07(-0.05,0.18)  |      |
| <b>Alcohol risk</b>           |                                       |      |                                       |      |                                       |      |                   |      |
| No                            | Reference                             |      | Reference                             |      | Reference                             |      | Reference         |      |
| Yes                           | -0.23(-0.48,0.02)                     |      | -0.08(-0.26,0.10)                     |      | <b>-0.12<sup>a</sup>(-0.22,-0.01)</b> |      | -0.06(-0.13,0.02) |      |
| <b>Multi-morbidity</b>        |                                       |      |                                       |      |                                       |      |                   |      |
| No                            | Reference                             |      | Reference                             |      | Reference                             |      | Reference         |      |
| Yes                           | <b>0.59<sup>b</sup>(0.20,0.97)</b>    |      | <b>0.50<sup>c</sup>(0.22,0.77)</b>    |      | 0.10(-0.06,0.25)                      |      | 0.07(-0.04,0.18)  |      |
| <b>Intervention condition</b> |                                       |      |                                       |      |                                       |      |                   |      |
| Control group                 | Reference                             |      | Reference                             |      | Reference                             |      | Reference         |      |
| Intervention group            | <b>-0.50<sup>c</sup>(-0.72,-0.28)</b> |      | <b>-0.42<sup>c</sup>(-0.58,-0.27)</b> |      | -0.05(-0.14,0.04)                     |      | -0.02(-0.08,0.05) |      |
| Adjusted R square, %          | 53.7                                  | 55.2 | 49.0                                  | 50.8 | 36.7                                  | 37.5 | 41.4              | 48.2 |

<sup>a</sup>  $p < .05$ , <sup>b</sup>  $p < .01$ , <sup>c</sup>  $p < .001$ , significant effect estimates in bold

Supplementary Table S3 Multivariate linear regression models (12-month change in physical activity and follow-up scores of frailty)

| Items                                                | 12-month follow-up overall frailty    |                                       | 12-month follow-up physical frailty   |                                       | 12-month follow-up psychological frailty |                                    | 12-month follow-up social frailty  |                                    |
|------------------------------------------------------|---------------------------------------|---------------------------------------|---------------------------------------|---------------------------------------|------------------------------------------|------------------------------------|------------------------------------|------------------------------------|
|                                                      | Crude Model                           | Adjusted Model                        | Crude Model                           | Adjusted Model                        | Crude Model                              | Adjusted Model                     | Crude Model                        | Adjusted Model                     |
|                                                      | B(95%CI)                              | B(95%CI)                              | B(95%CI)                              | B(95%CI)                              | B(95%CI)                                 | B(95%CI)                           | B(95%CI)                           | B(95%CI)                           |
| <b>12-month change in moderate physical activity</b> |                                       |                                       |                                       |                                       |                                          |                                    |                                    |                                    |
| Continued regular frequency                          | <i>Reference</i>                      | <i>Reference</i>                      | <i>Reference</i>                      | <i>Reference</i>                      | <i>Reference</i>                         | <i>Reference</i>                   | <i>Reference</i>                   | <i>Reference</i>                   |
| Decreased frequency                                  | <b>1.34<sup>c</sup>(1.02,1.66)</b>    | <b>1.31<sup>c</sup>(0.99,1.63)</b>    | <b>0.83<sup>c</sup>(0.60,1.06)</b>    | <b>0.80<sup>c</sup>(0.58,1.03)</b>    | <b>0.45<sup>c</sup>(0.32,0.58)</b>       | <b>0.43<sup>c</sup>(0.30,0.56)</b> | <b>0.13<sup>a</sup>(0.03,0.23)</b> | <b>0.14<sup>b</sup>(0.04,0.23)</b> |
| Continued low frequency                              | <b>1.31<sup>c</sup>(1.00,1.63)</b>    | <b>1.16<sup>c</sup>(0.84,1.49)</b>    | <b>0.86<sup>c</sup>(0.63,1.09)</b>    | <b>0.73<sup>c</sup>(0.51,0.96)</b>    | <b>0.47<sup>c</sup>(0.35,0.60)</b>       | <b>0.42<sup>c</sup>(0.29,0.55)</b> | <b>0.14<sup>b</sup>(0.05,0.24)</b> | <b>0.13<sup>b</sup>(0.04,0.23)</b> |
| Increased frequency                                  | -0.25(-0.64,0.13)                     | -0.25(-0.63,0.14)                     | -0.15(-0.42,0.12)                     | -0.15(-0.42,0.11)                     | 0.02(-0.13,0.18)                         | 0.01(-0.15,0.16)                   | -0.03(-0.15,0.09)                  | 0.02(-0.09,0.13)                   |
| <b>Baseline overall frailty</b>                      | <b>0.66<sup>c</sup>(0.62,0.70)</b>    | <b>0.62<sup>c</sup>(0.58,0.66)</b>    |                                       |                                       |                                          |                                    |                                    |                                    |
| <b>Baseline physical frailty</b>                     |                                       |                                       | <b>0.62<sup>c</sup>(0.58,0.66)</b>    | <b>0.60<sup>c</sup>(0.55,0.64)</b>    |                                          |                                    |                                    |                                    |
| <b>Baseline psychological frailty</b>                |                                       |                                       |                                       |                                       | <b>0.54<sup>c</sup>(0.50,0.59)</b>       | <b>0.53<sup>c</sup>(0.48,0.57)</b> |                                    |                                    |
| <b>Baseline social frailty</b>                       |                                       |                                       |                                       |                                       |                                          |                                    | <b>0.62<sup>c</sup>(0.59,0.66)</b> | <b>0.39<sup>c</sup>(0.34,0.44)</b> |
| <b>Age</b>                                           |                                       | <b>0.03<sup>a</sup>(0.00,0.05)</b>    |                                       | <b>0.02<sup>a</sup>(0.00,0.03)</b>    |                                          | 0.01(-0.00,0.02)                   |                                    | 0.00(-0.00,0.01)                   |
| <b>Sex</b>                                           |                                       |                                       |                                       |                                       |                                          |                                    |                                    |                                    |
| <i>Male</i>                                          |                                       | <i>Reference</i>                      |                                       | <i>Reference</i>                      |                                          | <i>Reference</i>                   |                                    | <i>Reference</i>                   |
| <i>Female</i>                                        |                                       | 0.20(-0.05,0.44)                      |                                       | 0.09(-0.08,0.26)                      |                                          | <b>0.10<sup>a</sup>(0.00,0.20)</b> |                                    | 0.04(-0.03,0.11)                   |
| <b>Country</b>                                       |                                       |                                       |                                       |                                       |                                          |                                    |                                    |                                    |
| <i>Spain</i>                                         | <i>Reference</i>                      | <i>Reference</i>                      | <i>Reference</i>                      | <i>Reference</i>                      | <i>Reference</i>                         | <i>Reference</i>                   | <i>Reference</i>                   | <i>Reference</i>                   |
| <i>Greece</i>                                        | -0.34(-0.74,0.06)                     | -0.10(-0.51,0.30)                     | <b>-0.41<sup>b</sup>(-0.70,-0.13)</b> | -0.29(-0.57,0.00)                     | 0.09(-0.07,0.26)                         | 0.15(-0.02,0.32)                   | 0.05(-0.08,0.17)                   | <b>0.17<sup>b</sup>(0.05,0.29)</b> |
| <i>Croatia</i>                                       | <b>0.56<sup>b</sup>(0.23,0.88)</b>    | <b>0.74<sup>c</sup>(0.36,1.13)</b>    | <b>0.26<sup>a</sup>(0.03,0.49)</b>    | <b>0.40<sup>b</sup>(0.13,0.67)</b>    | <b>0.22<sup>b</sup>(0.09,0.36)</b>       | <b>0.27<sup>b</sup>(0.12,0.43)</b> | <b>0.14<sup>b</sup>(0.04,0.24)</b> | <b>0.19<sup>b</sup>(0.08,0.30)</b> |
| <i>The Netherlands</i>                               | -0.33(-0.68,0.02)                     | -0.19(-0.58,0.21)                     | -0.21(-0.46,0.04)                     | -0.06(-0.34,0.22)                     | <b>-0.20<sup>b</sup>(-0.35,-0.06)</b>    | -0.14(-0.30,0.02)                  | 0.04(-0.07,0.15)                   | -0.00(-0.12,0.11)                  |
| <i>The United Kingdom</i>                            | <b>-0.61<sup>c</sup>(-0.91,-0.30)</b> | <b>-0.55<sup>b</sup>(-0.92,-0.17)</b> | <b>-0.55<sup>c</sup>(-0.77,-0.34)</b> | <b>-0.49<sup>c</sup>(-0.75,-0.22)</b> | <b>-0.20<sup>b</sup>(-0.32,-0.08)</b>    | -0.13(-0.28,0.02)                  | <b>0.10<sup>a</sup>(0.01,0.19)</b> | 0.03(-0.08,0.14)                   |
| <b>Educational level</b>                             |                                       |                                       |                                       |                                       |                                          |                                    |                                    |                                    |
| <i>Tertiary or higher</i>                            |                                       | <i>Reference</i>                      |                                       | <i>Reference</i>                      |                                          | <i>Reference</i>                   |                                    | <i>Reference</i>                   |
| <i>Secondary or equivalent</i>                       |                                       | 0.22(-0.15,0.60)                      |                                       | 0.19(-0.08,0.45)                      |                                          | 0.07(-0.09,0.22)                   |                                    | 0.01(-0.10,0.12)                   |
| <i>Primary or less versus</i>                        |                                       | <b>0.63<sup>b</sup>(0.20,1.05)</b>    |                                       | <b>0.46<sup>b</sup>(0.16,0.75)</b>    |                                          | <b>0.19<sup>a</sup>(0.01,0.36)</b> |                                    | 0.08(-0.05,0.20)                   |
| <b>Living situation</b>                              |                                       |                                       |                                       |                                       |                                          |                                    |                                    |                                    |
| <i>Living with others</i>                            |                                       | <i>Reference</i>                      |                                       | <i>Reference</i>                      |                                          | <i>Reference</i>                   |                                    | <i>Reference</i>                   |

|                               |                                       |                                       |                                       |                                    |
|-------------------------------|---------------------------------------|---------------------------------------|---------------------------------------|------------------------------------|
| <i>Living alone</i>           | 0.15(-0.10,0.39)                      | -0.08(-0.25,0.09)                     | <b>-0.11<sup>a</sup>(-0.21,-0.02)</b> | <b>0.62<sup>c</sup>(0.53,0.70)</b> |
| <b>Smoking</b>                |                                       |                                       |                                       |                                    |
| <i>No</i>                     | <i>Reference</i>                      | <i>Reference</i>                      | <i>Reference</i>                      | <i>Reference</i>                   |
| <i>Yes</i>                    | -0.02(-0.41,0.38)                     | -0.17(-0.45,0.12)                     | 0.09(-0.07,0.26)                      | 0.06(-0.06,0.18)                   |
| <b>Alcohol risk</b>           |                                       |                                       |                                       |                                    |
| <i>No</i>                     | <i>Reference</i>                      | <i>Reference</i>                      | <i>Reference</i>                      | <i>Reference</i>                   |
| <i>Yes</i>                    | -0.21(-0.45,0.04)                     | -0.07(-0.24,0.10)                     | <b>-0.11<sup>a</sup>(-0.21,-0.01)</b> | -0.05(-0.12,0.02)                  |
| <b>Multi-morbidity</b>        |                                       |                                       |                                       |                                    |
| <i>No</i>                     | <i>Reference</i>                      | <i>Reference</i>                      | <i>Reference</i>                      | <i>Reference</i>                   |
| <i>Yes</i>                    | <b>0.50<sup>a</sup>(0.12,0.87)</b>    | <b>0.45<sup>b</sup>(0.18,0.71)</b>    | 0.06(-0.10,0.21)                      | 0.05(-0.06,0.16)                   |
| <b>Intervention condition</b> |                                       |                                       |                                       |                                    |
| <i>Control group</i>          | <i>Reference</i>                      | <i>Reference</i>                      | <i>Reference</i>                      | <i>Reference</i>                   |
| <i>Intervention group</i>     | <b>-0.46<sup>c</sup>(-0.68,-0.25)</b> | <b>-0.39<sup>c</sup>(-0.55,-0.24)</b> | -0.04(-0.13,0.05)                     | -0.01(-0.08,0.05)                  |
| Adjusted R square, %          | 56.6                                  | 51.6                                  | 39.2                                  | 41.8                               |
|                               | 57.8                                  | 53.0                                  | 39.7                                  | 48.5                               |

<sup>a</sup>  $p < .05$ , <sup>b</sup>  $p < .01$ , <sup>c</sup>  $p < .001$ , significant effect estimates in bold

**Supplementary Table S4 Multiple linear regression models (12-month change in moderate physical activity and psychological frailty) stratified by country**

| Items                                                | Spain<br>12-month follow-up<br>Psychological frailty |                                    | Greece<br>12-month follow-up<br>Psychological frailty |                                    | Croatia<br>12-month follow-up<br>Psychological frailty |                                    | The Netherlands<br>12-month follow-up<br>Psychological frailty |                                    | The United Kingdom<br>12-month follow-up<br>Psychological frailty |                                    |
|------------------------------------------------------|------------------------------------------------------|------------------------------------|-------------------------------------------------------|------------------------------------|--------------------------------------------------------|------------------------------------|----------------------------------------------------------------|------------------------------------|-------------------------------------------------------------------|------------------------------------|
|                                                      | Crude Model<br>B(95%CI)                              | Adjusted Model<br>B(95%CI)         | Crude Model<br>B(95%CI)                               | Adjusted Model<br>B(95%CI)         | Crude Model<br>B(95%CI)                                | Adjusted Model<br>B(95%CI)         | Crude Model<br>B(95%CI)                                        | Adjusted Model<br>B(95%CI)         | Crude Model<br>B(95%CI)                                           | Adjusted Model<br>B(95%CI)         |
| <b>12-month change in moderate physical activity</b> |                                                      |                                    |                                                       |                                    |                                                        |                                    |                                                                |                                    |                                                                   |                                    |
| Continued regular frequency                          | <i>Reference</i>                                     | <i>Reference</i>                   | <i>Reference</i>                                      | <i>Reference</i>                   | <i>Reference</i>                                       | <i>Reference</i>                   | <i>Reference</i>                                               | <i>Reference</i>                   | <i>Reference</i>                                                  | <i>Reference</i>                   |
| Decreased frequency                                  | <b>0.55<sup>c</sup>(0.25,0.85)</b>                   | <b>0.57<sup>b</sup>(0.26,0.87)</b> | <b>0.67<sup>c</sup>(0.30,1.04)</b>                    | <b>0.69<sup>b</sup>(0.30,1.08)</b> | <b>0.50<sup>b</sup>(0.21,0.79)</b>                     | <b>0.48<sup>b</sup>(0.19,0.77)</b> | 0.09(-0.19,0.37)                                               | 0.06(-0.23,0.35)                   | <b>0.50<sup>c</sup>(0.25,0.74)</b>                                | <b>0.46<sup>c</sup>(0.22,0.71)</b> |
| Continued low frequency                              | <b>0.80<sup>c</sup>(0.43,1.16)</b>                   | <b>0.79<sup>c</sup>(0.42,1.16)</b> | <b>0.93<sup>c</sup>(0.54,1.32)</b>                    | <b>0.83<sup>c</sup>(0.40,1.26)</b> | <b>0.52<sup>c</sup>(0.28,0.76)</b>                     | <b>0.45<sup>b</sup>(0.19,0.70)</b> | 0.10(-0.22,0.42)                                               | -0.01(-0.34,0.33)                  | <b>0.30<sup>c</sup>(0.08,0.51)</b>                                | <b>0.23<sup>a</sup>(0.01,0.46)</b> |
| Increased frequency                                  | -0.21(-0.50,0.08)                                    | -0.19(-0.48,0.10)                  | 0.03(-0.51,0.57)                                      | -0.03(-0.60,0.53)                  | 0.05(-0.33,0.44)                                       | -0.02(-0.41,0.37)                  | <b>0.47<sup>b</sup>(0.15,0.79)</b>                             | <b>0.43<sup>a</sup>(0.10,0.75)</b> | -0.10(-0.39,0.19)                                                 | -0.08(-0.37,0.22)                  |
| <b>Baseline psychological frailty</b>                | <b>0.58<sup>c</sup>(0.49,0.67)</b>                   | <b>0.55<sup>c</sup>(0.46,0.64)</b> | <b>0.59<sup>c</sup>(0.47,0.72)</b>                    | <b>0.56<sup>c</sup>(0.42,0.70)</b> | <b>0.46<sup>c</sup>(0.36,0.56)</b>                     | <b>0.44<sup>c</sup>(0.34,0.54)</b> | <b>0.57<sup>c</sup>(0.46,0.67)</b>                             | <b>0.58<sup>c</sup>(0.48,0.69)</b> | <b>0.54<sup>c</sup>(0.46,0.63)</b>                                | <b>0.54<sup>c</sup>(0.45,0.63)</b> |
| <b>Age</b>                                           |                                                      | 0.01(-0.01,0.02)                   |                                                       | -0.00(-0.03,0.03)                  |                                                        | 0.01(-0.02,0.03)                   |                                                                | 0.02(-0.01,0.04)                   |                                                                   | 0.01(-0.00,0.03)                   |
| <b>Sex</b>                                           |                                                      |                                    |                                                       |                                    |                                                        |                                    |                                                                |                                    |                                                                   |                                    |
| Male                                                 |                                                      | <i>Reference</i>                   |                                                       | <i>Reference</i>                   |                                                        | <i>Reference</i>                   |                                                                | <i>Reference</i>                   |                                                                   | <i>Reference</i>                   |
| Female                                               |                                                      | 0.04(-0.15,0.24)                   |                                                       | 0.05(-0.30,0.39)                   |                                                        | <b>0.27<sup>a</sup>(0.03,0.52)</b> |                                                                | -0.02(-0.26,0.23)                  |                                                                   | 0.10(-0.07,0.26)                   |
| <b>Educational level</b>                             |                                                      |                                    |                                                       |                                    |                                                        |                                    |                                                                |                                    |                                                                   |                                    |
| Tertiary or higher                                   |                                                      | <i>Reference</i>                   |                                                       | <i>Reference</i>                   |                                                        | <i>Reference</i>                   |                                                                | <i>Reference</i>                   |                                                                   | <i>Reference</i>                   |
| Secondary or equivalent                              |                                                      | 0.11(-0.20,0.42)                   |                                                       | -0.19(-0.65,0.28)                  |                                                        | 0.14(-0.24,0.51)                   |                                                                | 0.14(-0.23,0.51)                   |                                                                   | -0.05(-0.33,0.23)                  |
| Primary or less versus                               |                                                      | <b>0.31<sup>a</sup>(0.02,0.60)</b> |                                                       | 0.02(-0.43,0.46)                   |                                                        | -0.07(-0.67,0.52)                  |                                                                | 0.17(-0.27,0.61)                   |                                                                   | -0.28(-0.89,0.32)                  |
| <b>Living situation</b>                              |                                                      |                                    |                                                       |                                    |                                                        |                                    |                                                                |                                    |                                                                   |                                    |
| Living with others                                   |                                                      | <i>Reference</i>                   |                                                       | <i>Reference</i>                   |                                                        | <i>Reference</i>                   |                                                                | <i>Reference</i>                   |                                                                   | <i>Reference</i>                   |
| Living alone                                         |                                                      | -0.08(-0.29,0.12)                  |                                                       | 0.01(-0.37,0.40)                   |                                                        | -0.22(-0.44,0.00)                  |                                                                | -0.15(-0.39,0.09)                  |                                                                   | -0.09(-0.26,0.07)                  |
| <b>Smoking</b>                                       |                                                      |                                    |                                                       |                                    |                                                        |                                    |                                                                |                                    |                                                                   |                                    |
| No                                                   |                                                      | <i>Reference</i>                   |                                                       | <i>Reference</i>                   |                                                        | <i>Reference</i>                   |                                                                | <i>Reference</i>                   |                                                                   | <i>Reference</i>                   |
| Yes                                                  |                                                      | 0.17(-0.21,0.54)                   |                                                       | 0.01(-0.41,0.43)                   |                                                        | <b>0.41<sup>a</sup>(0.01,0.81)</b> |                                                                | 0.08(-0.28,0.43)                   |                                                                   | -0.08(-0.39,0.24)                  |
| <b>Alcohol risk</b>                                  |                                                      |                                    |                                                       |                                    |                                                        |                                    |                                                                |                                    |                                                                   |                                    |

|                               |                   |                   |                   |                   |                   |                  |                  |                  |                  |      |
|-------------------------------|-------------------|-------------------|-------------------|-------------------|-------------------|------------------|------------------|------------------|------------------|------|
| No                            | <i>Reference</i>  | <i>Reference</i>  | <i>Reference</i>  | <i>Reference</i>  | <i>Reference</i>  | <i>Reference</i> | <i>Reference</i> | <i>Reference</i> | <i>Reference</i> |      |
| Yes                           | -0.04(-0.23,0.16) | -0.31(-0.64,0.02) | -0.29(-0.58,0.00) | -0.02(-0.20,0.23) | 0.00(-0.17,0.18)  |                  |                  |                  |                  |      |
| <b>Multi-morbidity</b>        |                   |                   |                   |                   |                   |                  |                  |                  |                  |      |
| No                            | <i>Reference</i>  | <i>Reference</i>  | <i>Reference</i>  | <i>Reference</i>  | <i>Reference</i>  | <i>Reference</i> | <i>Reference</i> | <i>Reference</i> | <i>Reference</i> |      |
| Yes <i>versus</i> no          | 0.02(-0.26,0.31)  | 0.29(-0.24,0.83)  | -0.18(-0.53,0.18) | 0.10(-0.21,0.41)  | 0.14(-0.22,0.49)  |                  |                  |                  |                  |      |
| <b>Intervention condition</b> |                   |                   |                   |                   |                   |                  |                  |                  |                  |      |
| Control group                 | <i>Reference</i>  | <i>Reference</i>  | <i>Reference</i>  | <i>Reference</i>  | <i>Reference</i>  | <i>Reference</i> | <i>Reference</i> | <i>Reference</i> | <i>Reference</i> |      |
| Intervention group            | 0.13(-0.05,0.31)  | -0.12(-0.43,0.19) | -0.19(-0.40,0.01) | -0.23(-0.45,0.00) | -0.04(-0.20,0.12) |                  |                  |                  |                  |      |
| Adjusted R square, %          | 35.7              | 36.4              | 44.5              | 44.4              | 25.6              | 27.7             | 33.2             | 33.2             | 30.9             | 30.4 |

<sup>a</sup>  $p < 0.05$ , <sup>b</sup>  $p < 0.01$ , <sup>c</sup>  $p < 0.001$ , significant effect estimates in bold

**Supplementary Figure S1 Frequency of moderate physical activity of participants (three categories of frequency of physical activity; ‘More than once a week’= (a) more than once a week; ‘One a week or less’= (b) once a week and (c) one to three times a month; ‘Never’= (d) hardly ever, or never)**

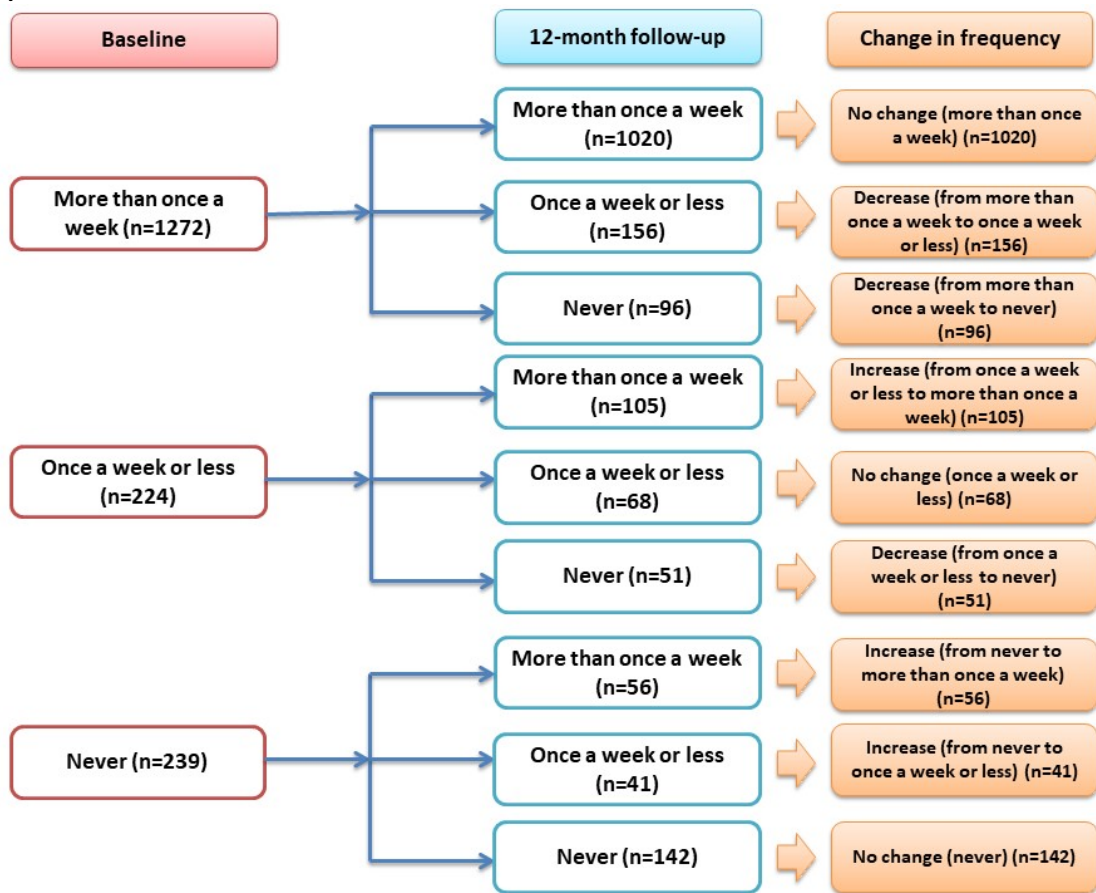

Supplement: JGS-68-1484-s001.pdf [file JGS-68-1484-s001.pdf]
